# Supplementary material for: Advanced Electrochemical Degradation of Organic Pollutants From Water Using Sb-Doped SnO2/Ti Anode and Assisted by Granular Activated Carbon
Source: Preprints.org preprint supplement (doi:10.20944/preprints202305.2190.v1), 2023-05-31
Supplement: Supplementary file 3 [file supplementary]

Advanced electrochemical degradation of organic pollutants from water using Sb-doped SnO2/Ti anode and assisted by granular activated carbon

Anamaria Baciu 1, Corina Orha 2, Radu Nicolae1, Mircea Nicolaescu1,2, Sorina Ilies3, and Florica Manea1*

1 Department of Applied Chemistry and Engineering of Inorganic Compounds and Environment, Politehnica University of Timisoara, Blv. Vasile Parvan No. 6, 300223, Timisoara, Romania; [anamaria.baciu@upt.ro](mailto:anamaria.baciu@upt.ro) (A.B.); [florica.manea@upt.ro](mailto:florica.manea@upt.ro) (F.M.); [radu.nicolae@student.upt.ro](mailto:radu.nicolae@student.upt.ro) (R.N.)

2 National Institute for Research and Development in Electrochemistry and Condensed Matter, Timisoara, Condensed Matter Department, 1 P. Andronescu Street, 300254, Timisoara, Romania; [orha.corina@gmail.com](mailto:orha.corina@gmail.com) (C.O.), [mircea.nicolaescu@student.upt.ro](mailto:mircea.nicolaescu@student.upt.ro) (M.N.)

3 “Coriolan Drăgulescu” Institute of Chemistry, Romanian Academy, 24 Mihai Viteazu Bvd., 300223 Timisoara, Romania, [sorinailies@acad-icht.tm.edu.ro](mailto:sorinailies@acad-icht.tm.edu.ro) (S.I.)

***** Correspondence: [florica.manea@upt.ro](mailto:florica.manea@upt.ro)

**
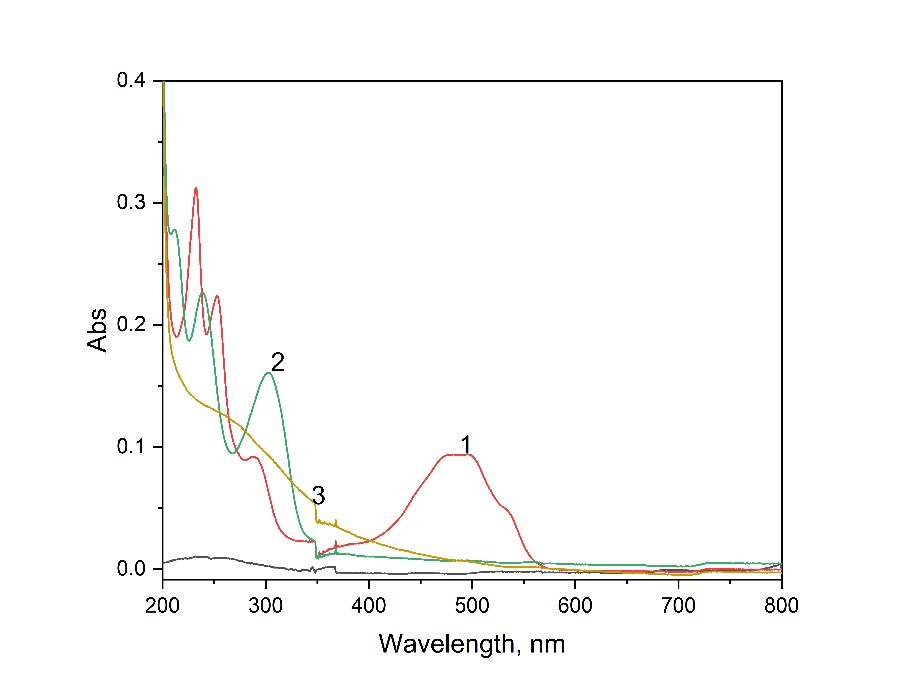
**

**Figure S1.** UV-VIS spectra in 0.1 M Na2SO4 supporting electrolyte and in the presence of different initial pollutants: 5 mg·L-1 DOX (curve 1), 5 mg·L-1 L CCB (CURVE 2), and 10 mg·L-1 HA (curve 3).


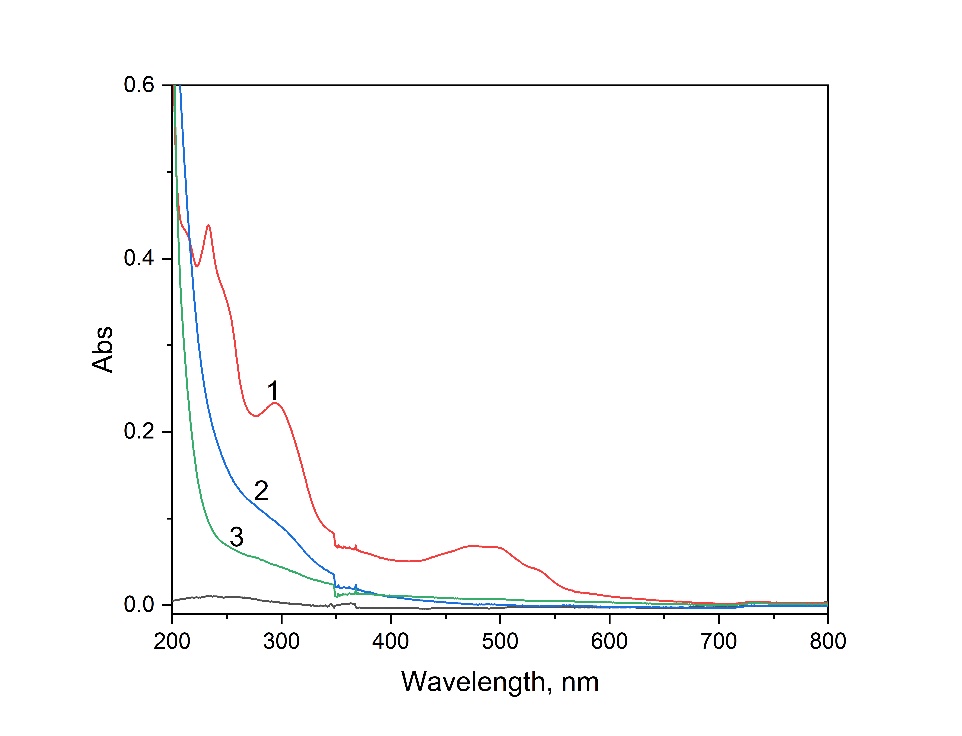


**Figure S2.** UV-VIS spectra in 0.1 M Na2SO4 supporting electrolyte, in the presence of an initial mixture of DOX+CCB+HA pollutants (curve 1) and after treatment by EO (curve 2), and after treatment by EF (curve 3) at an applied potential of 3.00 V vs. SCE.
